# Supplementary figures and images for: Gene Expression Profiling of FFPE Samples: A Titration Test
Source: PubMed Central journal article supplement — Technol Cancer Res Treat. 2022 Nov 22;21:15330338221129710. doi: 10.1177/15330338221129710 (PMC9706083; doi:10.1177/15330338221129710), 2022-11-22

# Supplementary Figure

## 1

### A

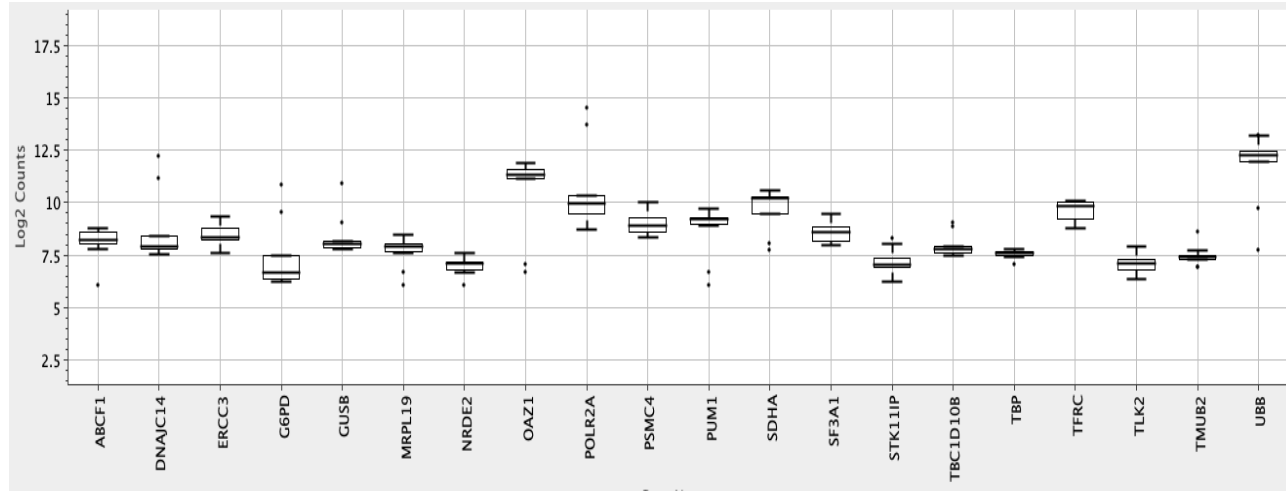

### B

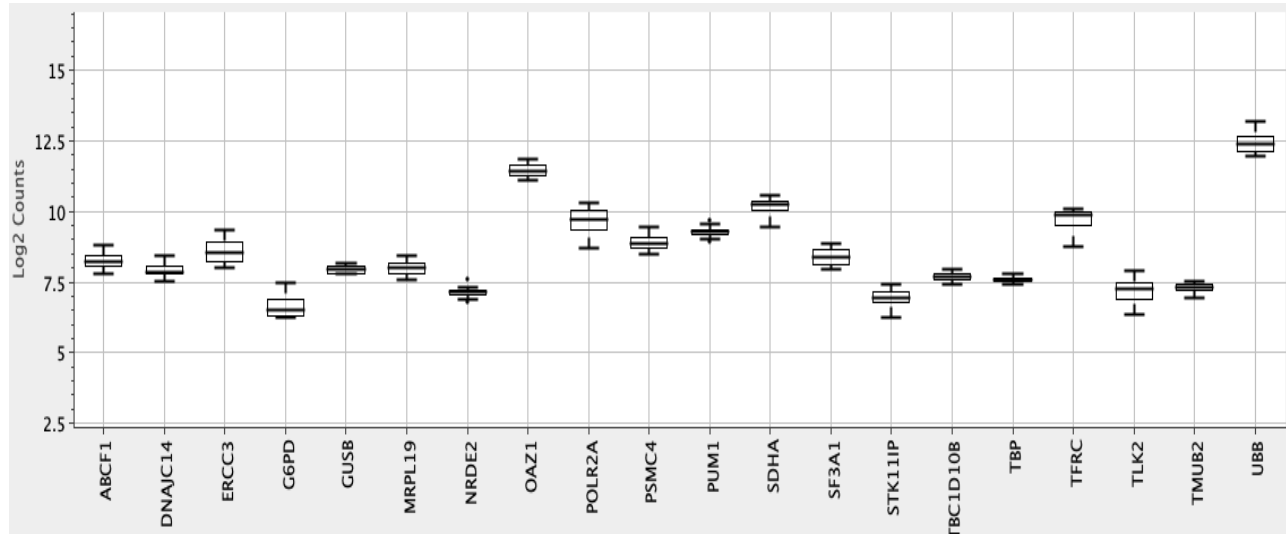

# Supplementary Figure

2

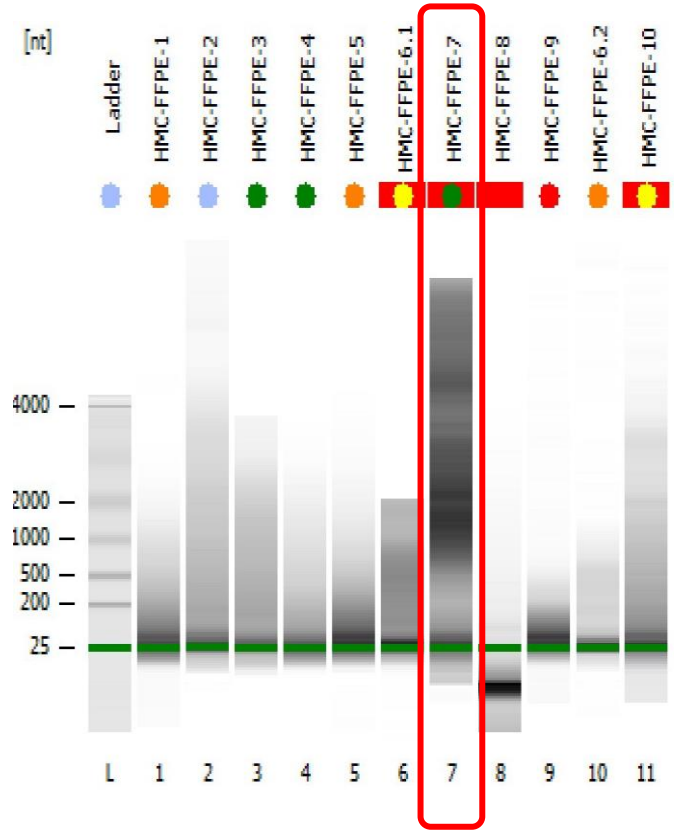

Supplement: sj-pdf-1-tct-10.1177_15330338221129710.pdf [file sj-pdf-1-tct-10.1177_15330338221129710.pdf]
